# Supplementary material for: Excitation dependent recombination studies on SnO2/TiO2electrospun nanofibers
Source: Royal Society of Chemistry journal article supplement (doi:10.1039/c5ra09787h), 2015-01-01
Supplement: c5ra09787h1.pdf [file c5ra09787h1.pdf]

## Supplementary Information

### Excitation dependent recombination studies on SnO<sub>2</sub>/TiO<sub>2</sub> electrospun nanofibers†

Veluru Jagadeesh babu<sup>a,\*</sup>, Sessa Vempati<sup>a,\*</sup>, Yelda Ertas<sup>a</sup>, Tamer Uyar<sup>a,b,\*</sup>,

<sup>a</sup>UNAM-National Nanotechnology Research Centre, Bilkent University, Ankara, 06800, Turkey.

<sup>b</sup>Institute of Materials Science & Nanotechnology, Bilkent University, Ankara, 06800, Turkey.

Contact: [vjbabu2002@gmail.com](mailto:vjbabu2002@gmail.com); [svempati01@qub.ac.uk](mailto:svempati01@qub.ac.uk); [uyar@unam.bilkent.edu.tr](mailto:uyar@unam.bilkent.edu.tr);

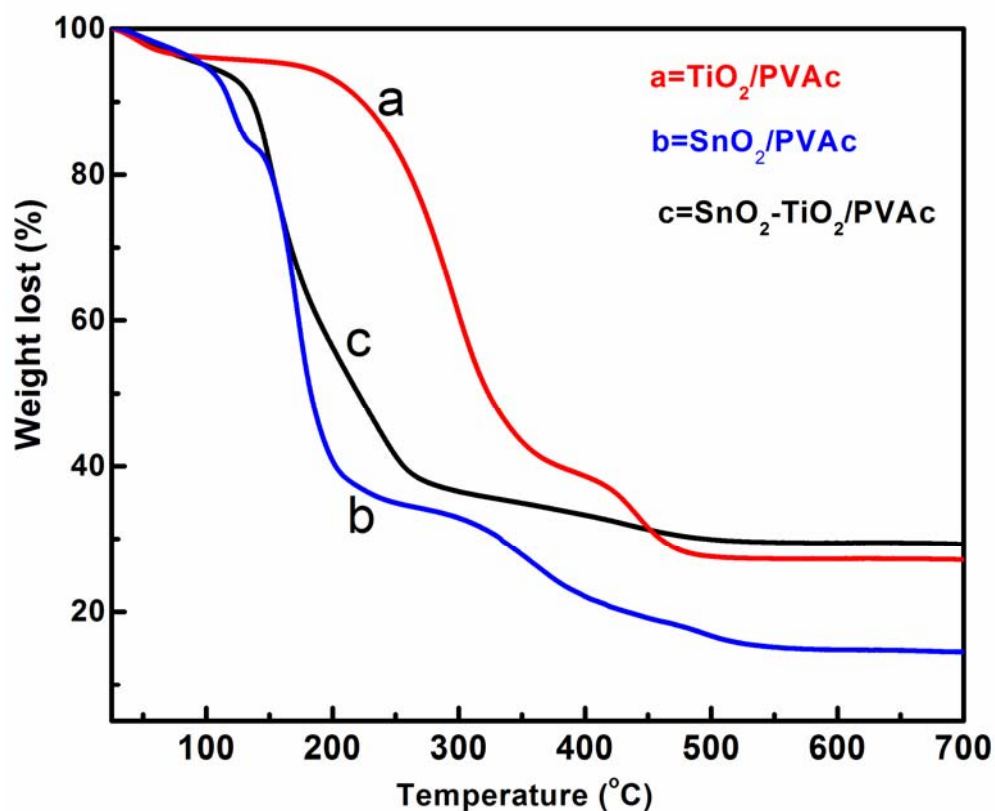

**Figure SI-1:** TGA thermograms of the as-spun nanostructures of (a) TiO<sub>2</sub>/PVAc (b) SnO<sub>2</sub>/PVAc and (c) SnO<sub>2</sub>-TiO<sub>2</sub>/PVAc.

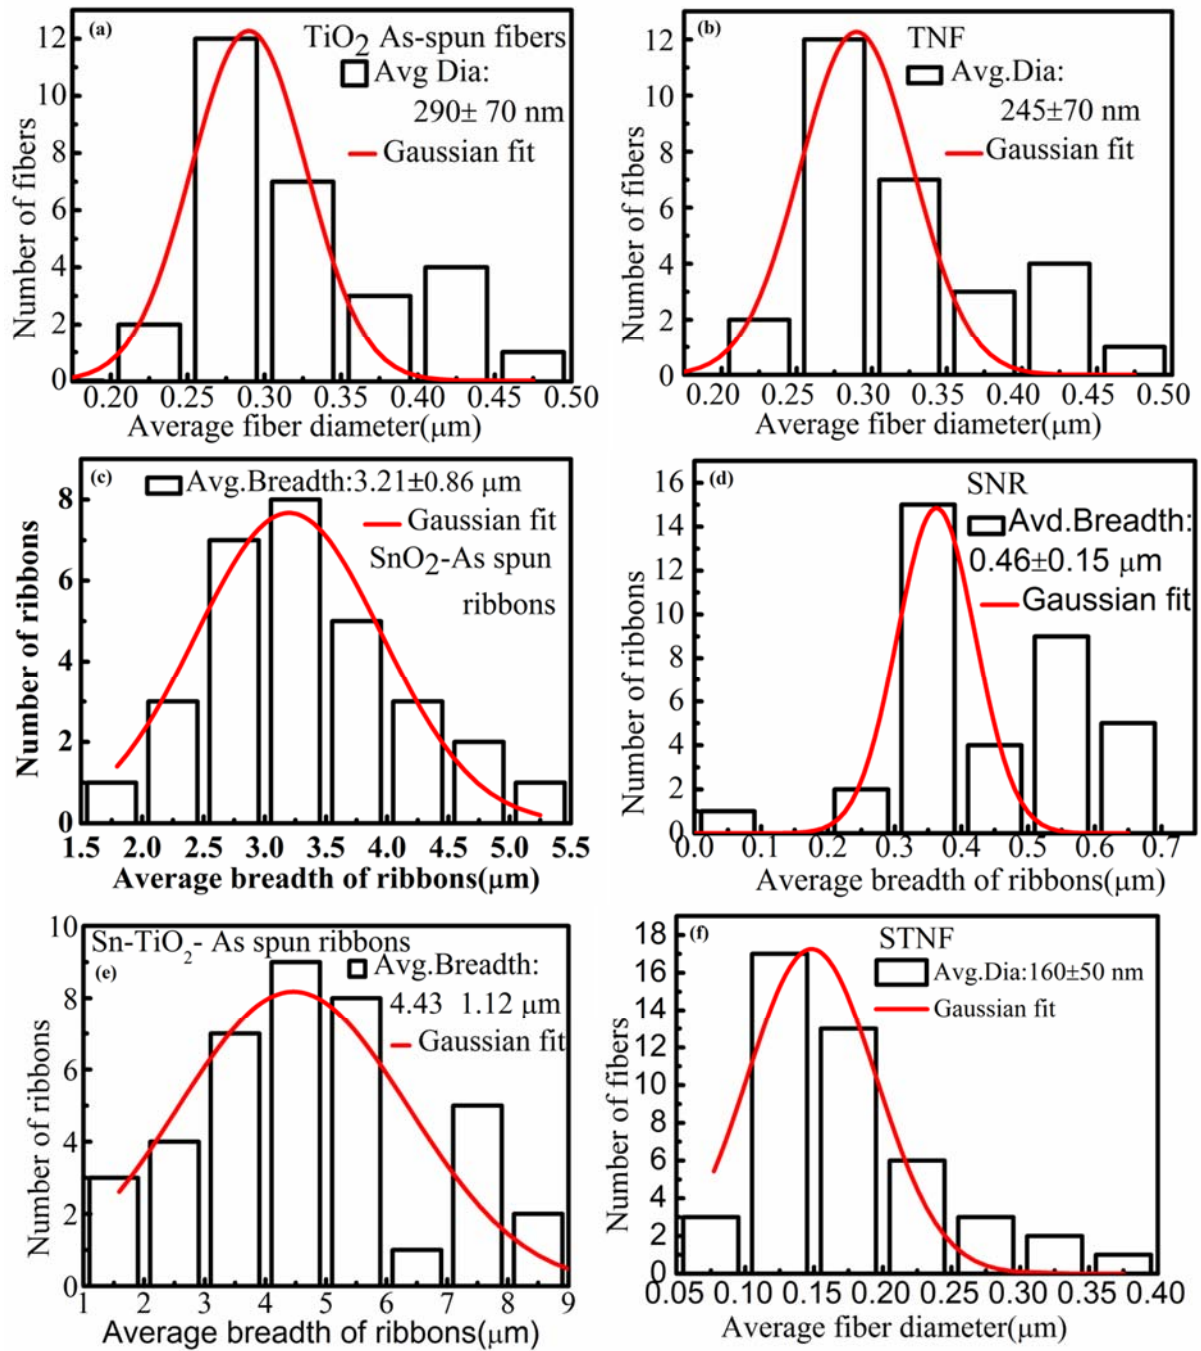

**Figure SI-2:** The fiber dimensions from SEM images of as spun (a) TiO<sub>2</sub> (c) SnO<sub>2</sub> (e) SnO<sub>2</sub>-TiO<sub>2</sub> and after calcination (b) TNF (d) SNR (f) STNF at 450 °C respectively.

**Table SI-1** : The average dimensions of the fibers and ribbons.

| Compound                           |      |         | Avg. Dimensions |
|------------------------------------|------|---------|-----------------|
| TiO <sub>2</sub>                   | TNF  | As-spun | 290±70 nm       |
|                                    |      | 450 °C  | 245±70 nm       |
| SnO <sub>2</sub>                   | SNR  | As-spun | 3.21±0.86 μm    |
|                                    |      | 450 °C  | 0.46±0.15 μm    |
| SnO <sub>2</sub> -TiO <sub>2</sub> | STNF | As-spun | 4.43±1.12 μm    |
|                                    |      | 450 °C  | 160±50 nm       |

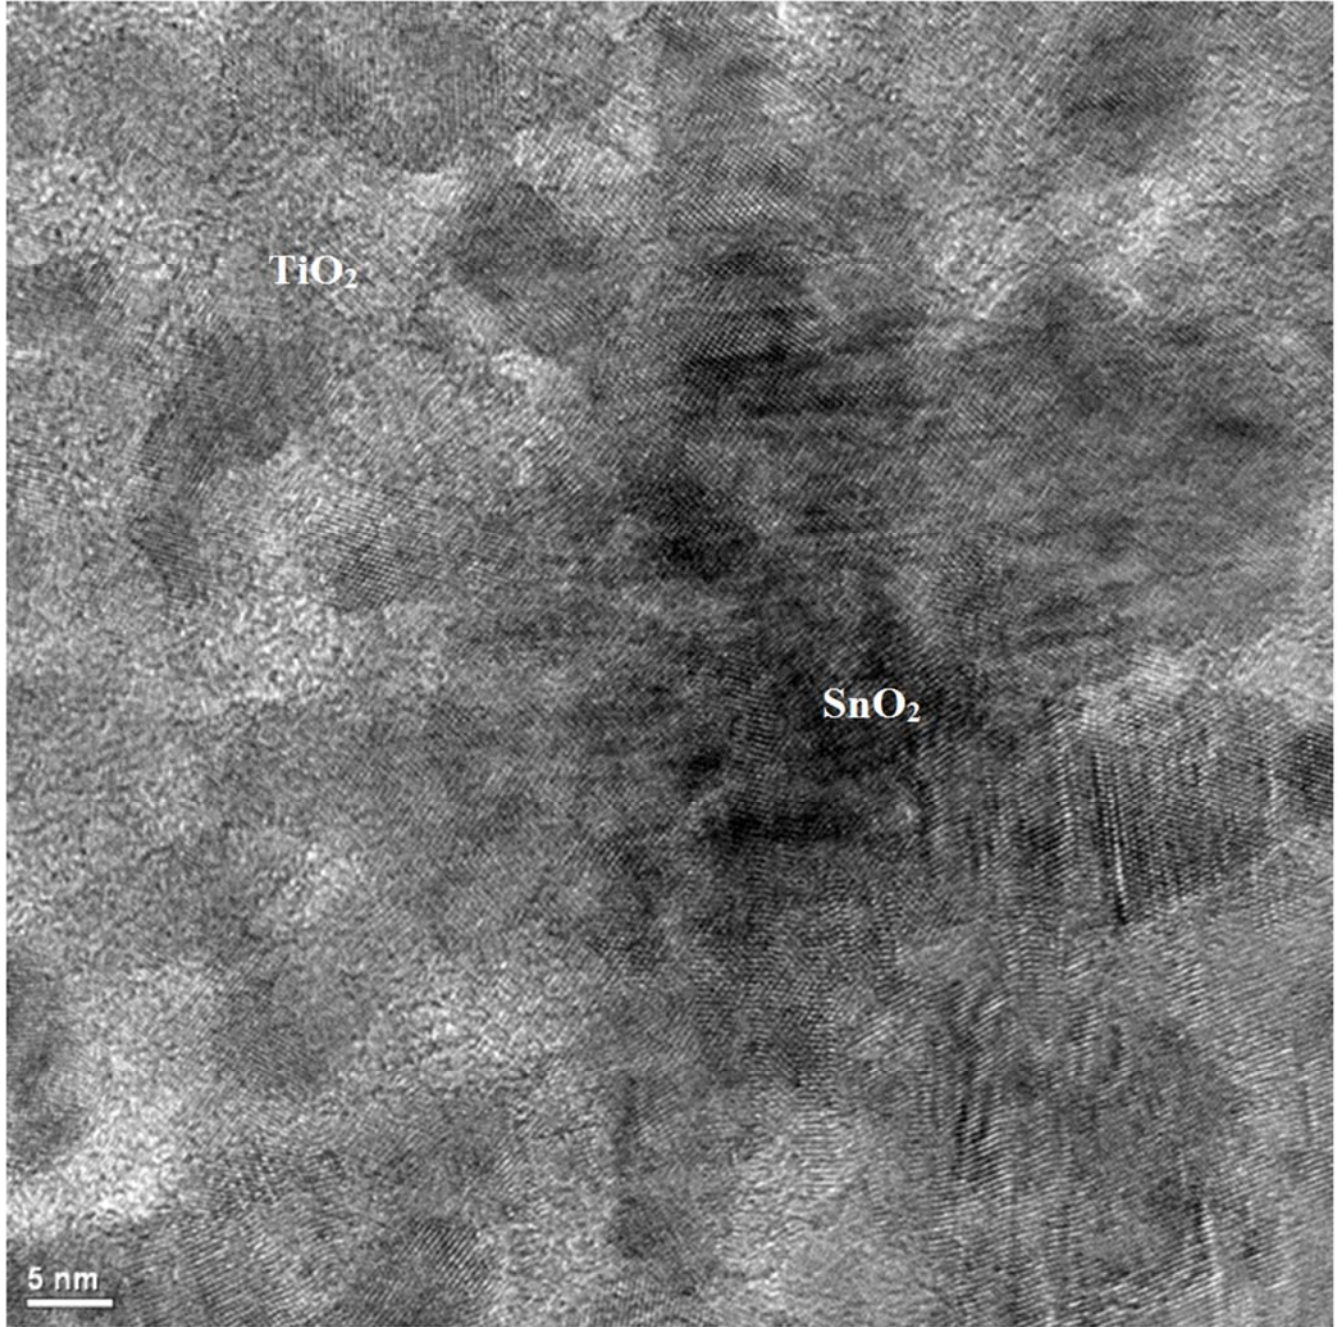

**Figure SI-3** : Magnified TEM image to see lattice patterns of  $\text{TiO}_2$  and  $\text{SnO}_2$ .

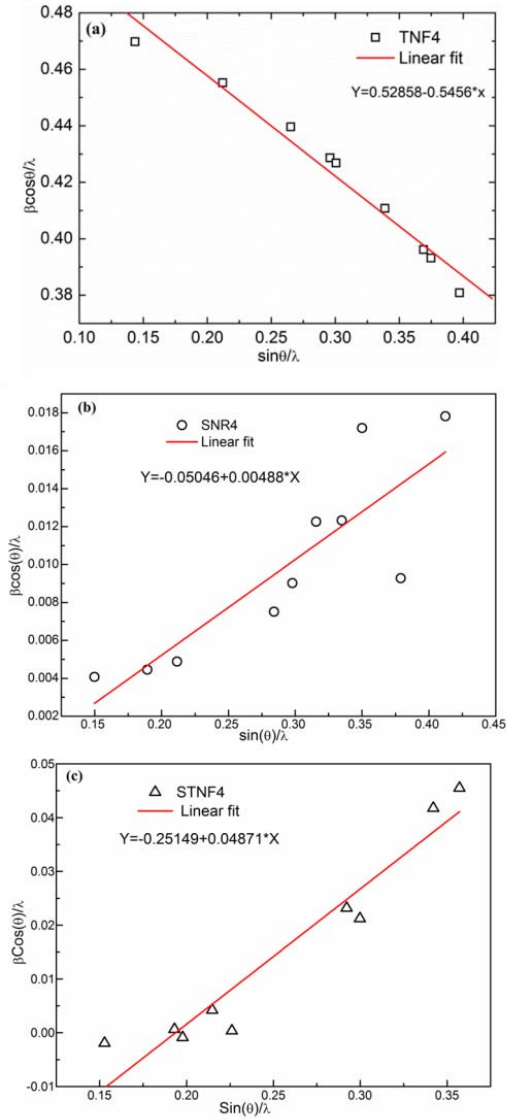

Figure SI-4: Williamson-Hall plots for (a) TNF4 (b) SNR4 and (c) STNF4 from the XRD data.

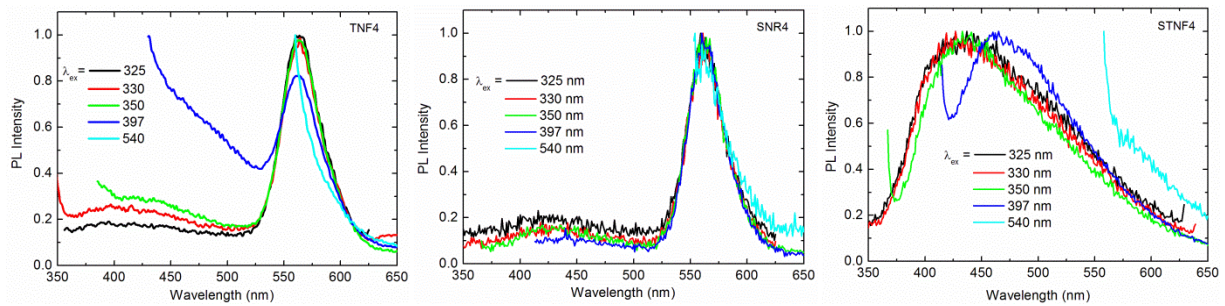

Figure SI-5 : PL emission spectra of all electrospun nanofibers at different excitation wavelengths.

**Table SI- 2: PL peak positions (Pk), Intensity (ht) and full width at half maximum (fwhm) at different excitation.**

| Sample | Range | Pk (nm) | 325   |        | 330   |        | 350, 3.54 |       | 397, 3.12 |       | 540ex |      |
|--------|-------|---------|-------|--------|-------|--------|-----------|-------|-----------|-------|-------|------|
|        |       |         | ht    | fwhm   | ht    | fwhm   | ht        | fwhm  | ht        | fwhm  | ht    | fwhm |
| TNF4   | R1    | 383     | 0.049 | 34.06  | 0.079 | 35.43  | 0.011     | 25.23 |           |       |       |      |
|        |       | 408     | 0.037 | 26.49  | 0.074 | 45.52  | 0.007     | 25.20 |           |       |       |      |
|        |       | 435     | 0.033 | 44.97  | 0.052 | 50.92  | 0.008     | 27.49 | 0.003     | 34.14 |       |      |
|        |       | 487     | 0.008 | 18.32  | 0.019 | 22.35  | 0.003     | 25.54 | 0.001     | 37.34 |       |      |
|        | R2    | 562     | 0.84  | 37.18  | 0.84  | 35.61  | 0.048     | 33.53 | 0.0047    | 49.75 |       |      |
|        |       | 585     | 0.24  | 52.12  | 0.22  | 43.82  | 0.013     | 33.56 | 0.00071   | 72.84 |       |      |
| SNR4   | R1    | 372     | 0.019 | 24.99  | 0.019 | 27.44  | 0.027     | 11.49 |           |       |       |      |
|        |       | 406     | 0.081 | 40.83  | 0.071 | 48.79  | 0.057     | 34.08 |           |       |       |      |
|        |       | 440     | 0.078 | 35.34  | 0.053 | 39.92  | 0.098     | 44.72 | 0.062     | 50.38 |       |      |
|        |       | 492     | 0.016 | 32.38  | 0.024 | 24.85  | 0.019     | 31.09 | 0.019     | 22.81 |       |      |
|        | R2    | 561     | 0.84  | 36.82  | 0.18  | 55.52  | 0.78      | 36.18 | 0.19      | 56.42 |       |      |
|        |       | 585     | 0.84  | 35.38  | 0.20  | 53.81  | 0.82      | 35.67 | 0.20      | 53.42 |       |      |
| STNF4  | R1    | 373     | 0.251 | 31.41  | 0.144 | 32.00  |           |       |           |       |       |      |
|        |       | 402     | 0.466 | 31.18  | 0.440 | 38.32  | 0.435     | 47.18 |           |       |       |      |
|        |       | 433     | 0.658 | 55.50  | 0.508 | 59.22  | 0.632     | 55.21 | 0.495     | 59.06 |       |      |
|        |       | 488     | 0.686 | 91.82  | 0.648 | 106.88 | 0.656     | 82.78 | 0.746     | 78.60 |       |      |
|        | R2    | 560     | 0.146 | 73.91  | 0.115 | 86.69  | 0.183     | 56.77 | 0.237     | 42.28 |       |      |
|        |       | 586     | 0.108 | 121.25 | 0.075 | 123.92 | 0.122     | 70.93 | 0.091     | 37.90 |       |      |

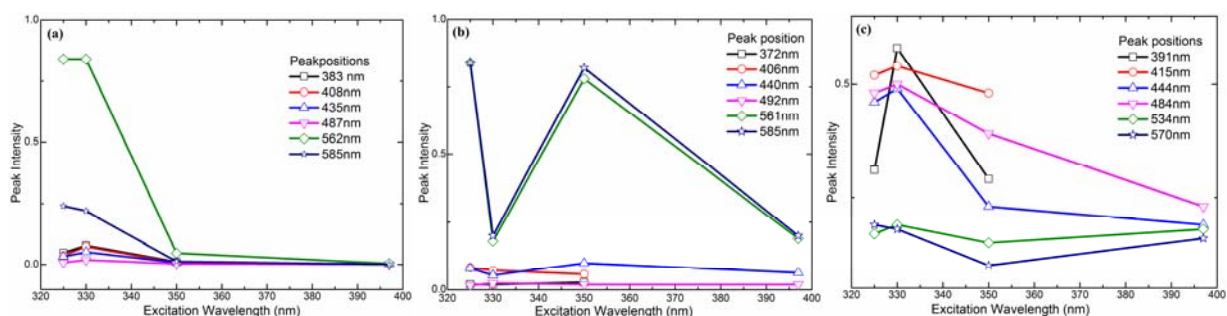

**Figure SI-6: Intensity variation with respect to the excitation wavelength at all the PL peaks.**
